# Supplementary material for: Characterization of a L136P mutation in Formin-like 2 (FMNL2) from a patient with chronic inflammatory bowel disease
Source: PubMed Central journal article supplement (PMC8158924; doi:10.1371/journal.pone.0252428), 2021-05-27

The HRP-Signal was detected on Medical X-Ray Films (Fuji) using X-Ray Film Processor (Medical Index)

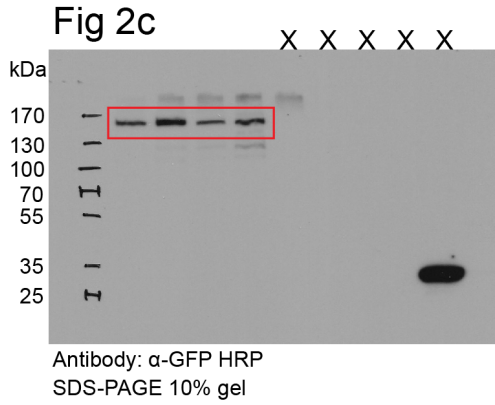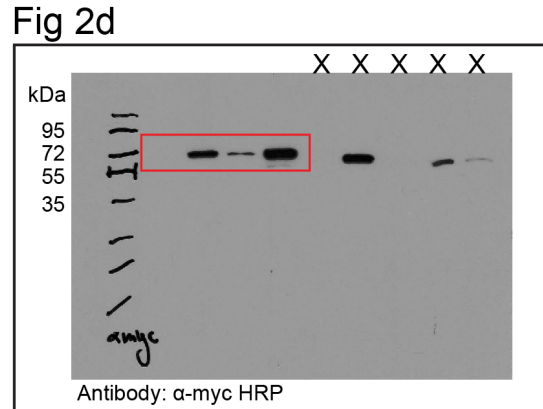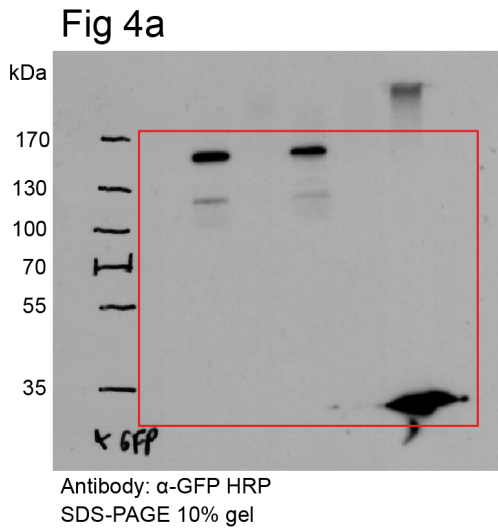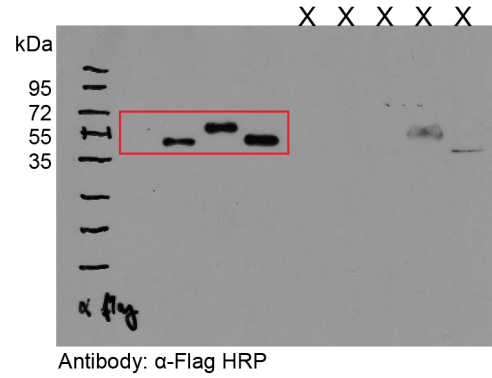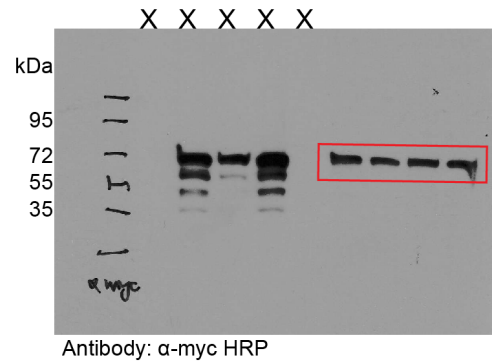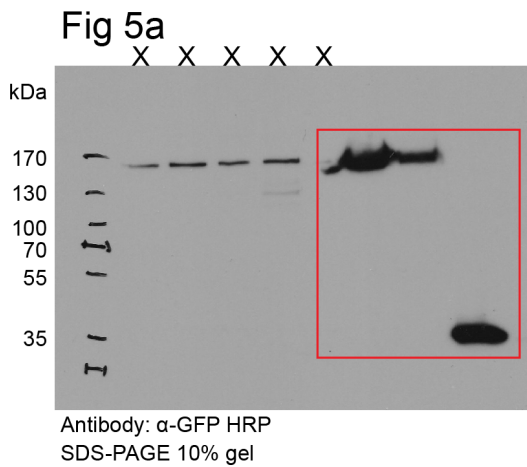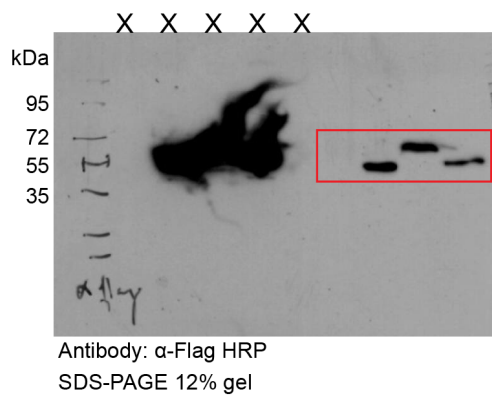

Supplement: pone.0252428.s004.pdf [file pone.0252428.s004.pdf]
